# Supplementary material for: The monomeric but not homotrimeric spike protein of SARS-CoV-2 activates TLR4 signaling
Source: Springer Nature journal article supplement (doi:10.1007/s11033-025-10736-4), 2025-06-23
Supplement: MOESM1 [file 11033_2025_10736_MOESM1_ESM.pdf]

# **Supplementary Information**

**The monomeric but not homotrimeric spike protein of SARS-CoV-2  
activates TLR4 signaling**

Charlotte Lübow, Günther Weindl\*

University of Bonn, Pharmaceutical Institute, Section of Pharmacology and Toxicology,  
Germany

\*e-mail: [guenther.weindl@uni-bonn.de](mailto:guenther.weindl@uni-bonn.de).

This PDF file includes:

Supplementary Figures 1 and 2

## Supplementary figures

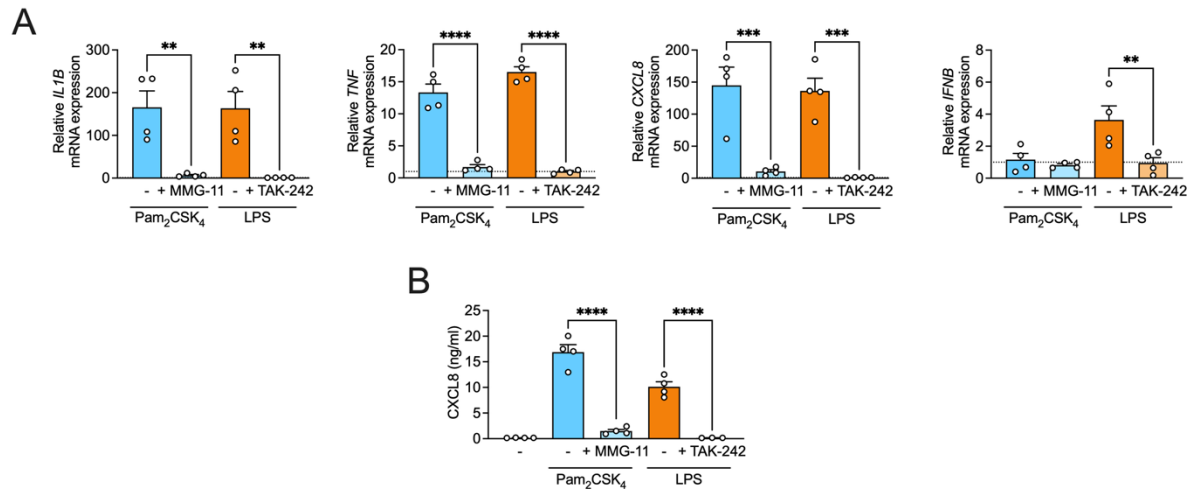

**Supplementary Fig. 1. (A, B)** THP-1 macrophages were preincubated with or without the TLR2 antagonist MMG-11 (50  $\mu$ M) or the TLR4 antagonist TAK-242 (2.8  $\mu$ M) for 1 h and subsequently stimulated with Pam<sub>2</sub>CSK<sub>4</sub> (1 ng/ml) or LPS (10 ng/ml) for 4 h. **(A)** Gene expression of *IL1B*, *TNF*, *CXCL8*, and *IFNB* were normalized to the housekeeping gene *GAPDH* (control assigned as 1.0, dotted line). **(B)** Cell culture supernatants were analyzed by ELISA for CXCL8. Mean + SEM ( $n = 4$ ). \*\* $P < 0.01$ , \*\*\* $P < 0.001$ , \*\*\*\* $P < 0.0001$ ; ANOVA followed by Bonferroni posttest.

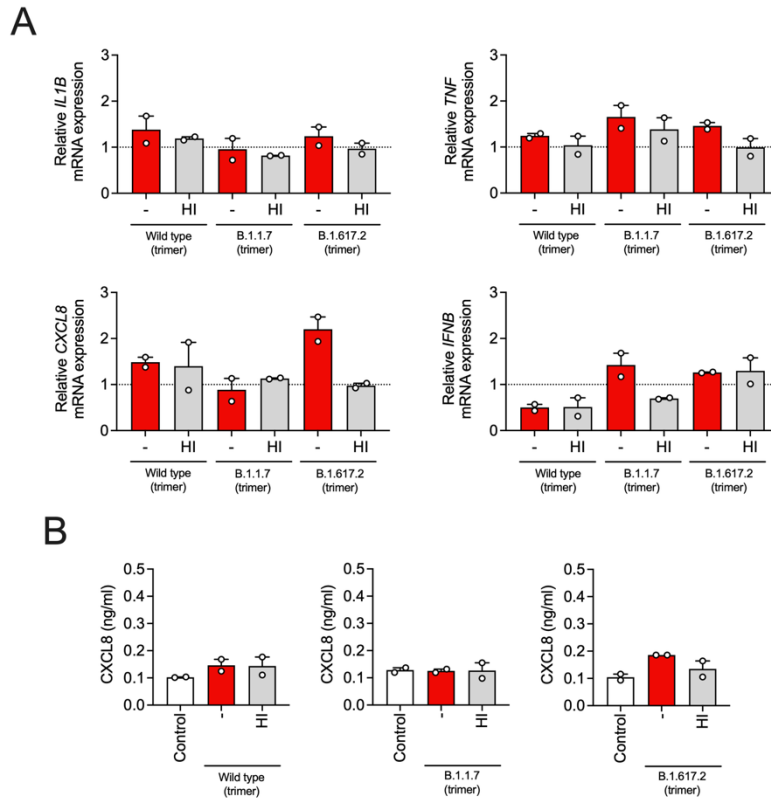

**Supplementary Fig. 2. (A, B)** THP-1 macrophages were stimulated with trimeric recombinant SARS-CoV-2 spike protein wild type, B.1.1.7 (alpha variant), or B.1.617.2 (delta variant), or the corresponding heat-inactivated proteins (HI) (each at a concentration of 133 nM) for 4 h. **(A)** Gene expression values of *IL1B*, *TNF*, *CXCL8*, and *IFNB* were normalized to the housekeeping gene *GAPDH* (control assigned as 1.0, dotted line). **(B)** Cell culture supernatants were analyzed by ELISA for CXCL8. Mean + SEM ( $n = 2$ ).
